# Supplementary material for: Defective Interferon Gamma Production by Tumor-Specific CD8+ T Cells Is Associated With 5′Methylcytosine-Guanine Hypermethylation of Interferon Gamma Promoter
Source: PubMed Central journal article supplement (PMC7066077; doi:10.3389/fimmu.2020.00310), 2020-03-05
Supplement: Data_Sheet_1.pdf [file Data_Sheet_1.pdf]

## Supplementary Material

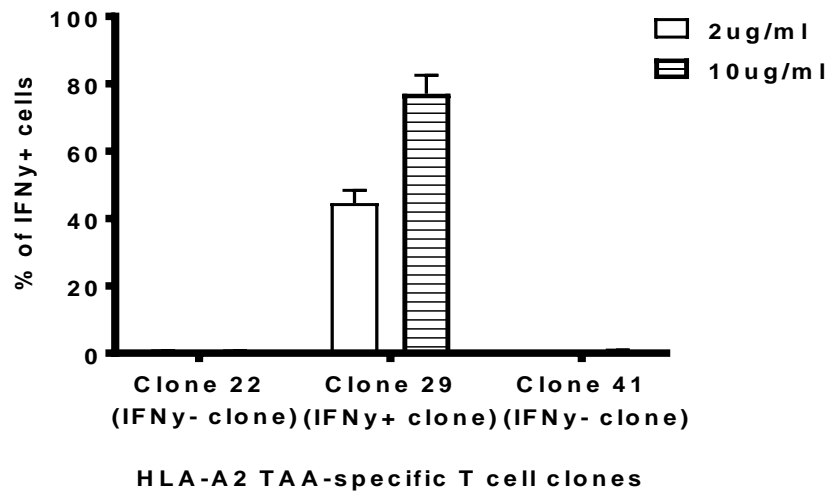

**Supplementary Figure 1. Inability of T cell clone to express IFN $\gamma$  at high antigen-stimulation.** T cell clones 22 and 41 do not express IFN $\gamma$ , even when co-cultured with 10 $\mu$ g/ml peptide-stimulated BCL. Only T cell clone 29 expresses IFN $\gamma$ , at both 1 $\mu$ g/ml and 10 $\mu$ g/ml peptide-stimulated BCL. N, number of experimental repeats= 3. \* represents P-value less than 0.5, analysis performed with one-way ANOVA with Tukey's multiple comparison test.

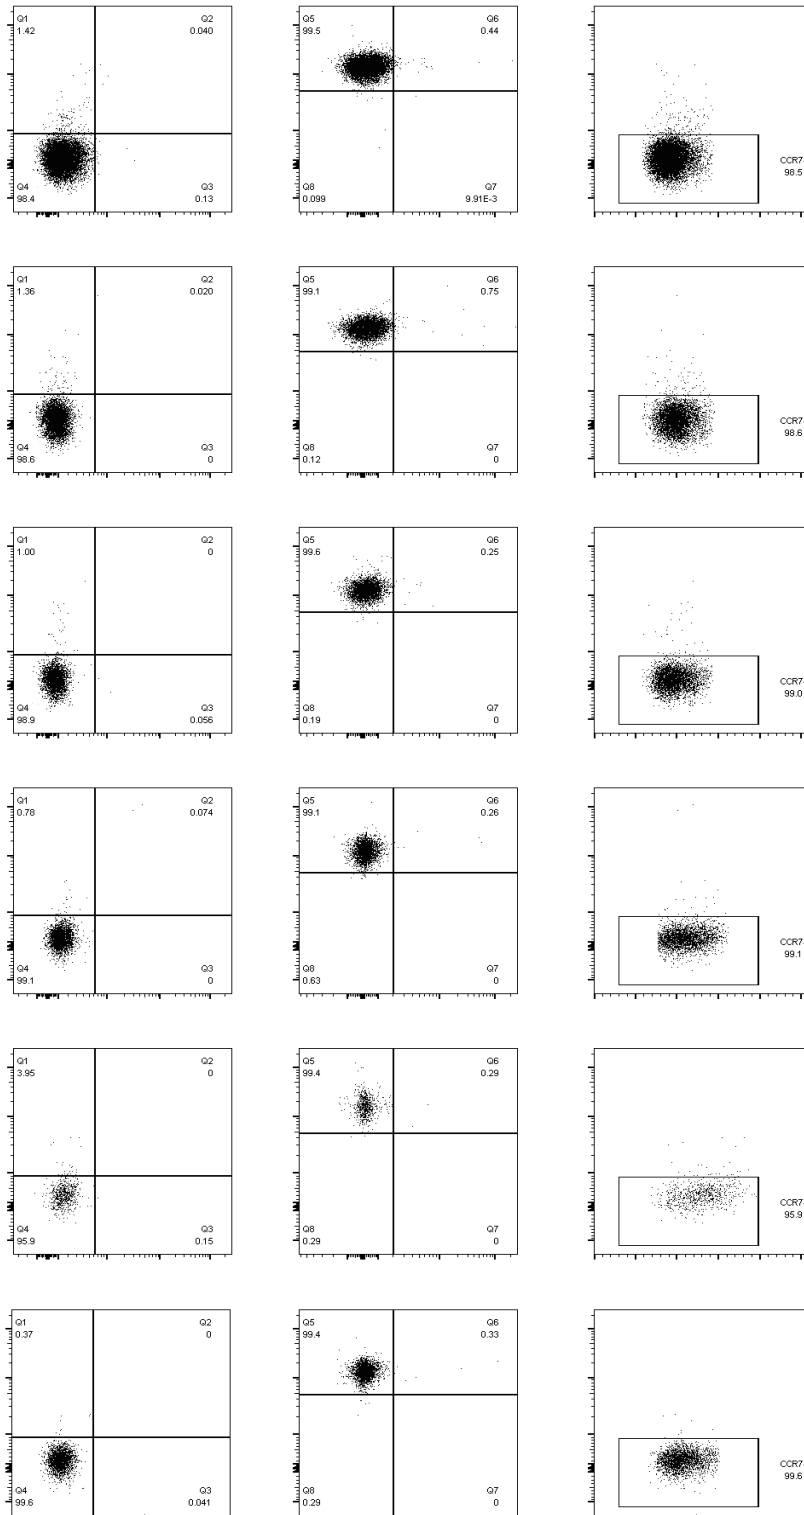

**Supplementary Figure 2. Surface phenotype of SSX-2-specific T cell clones.** Representative dot plots showing that all six T cell clones have surface expression of CD45RA, CD45RO, CCR7, CD27 and CD28 *in vitro*.

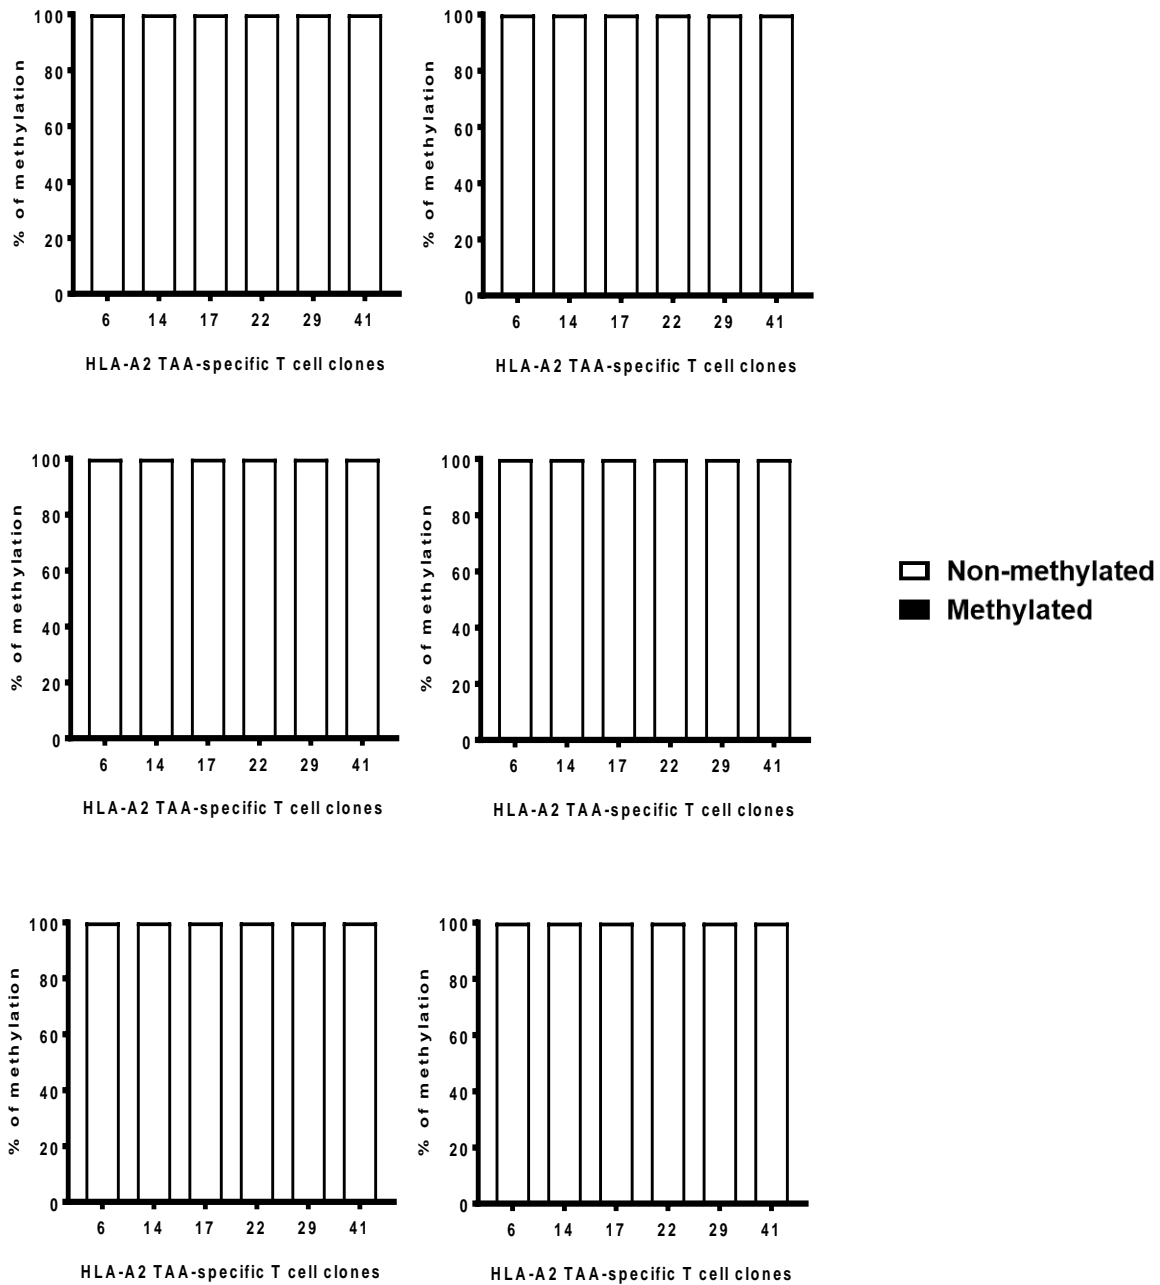

**Supplementary Figure 3. CpG methylation of TNF $\alpha$  promoter.** In contrast to IFN $\gamma$  methylation, no presence of CPG methylation was found on each of the tumor-specific CTL clones tested.

**Supplementary Table 1.** The T cell receptor of the six SSX-2-specific T cell clones.

| SSX-2-specific clone ID | TCR $\alpha$     | CDR3 (aa)         | TCR $\beta$       | CDR3 (aa)             |
|-------------------------|------------------|-------------------|-------------------|-----------------------|
| Clone 6                 | TRAV 8-6 TRAJ 30 | CAVSDQNRDDKIIFGKG | TRBV 6-1 TRBJ 2-7 | CASSQGLTYGPSSYEQTFGPG |
| Clone 14                | TRAV 8-6 TRAJ 30 | CAVSDQNRDDKIIFGKG | TRBV 6-1 TRBJ 2-7 | CASSQGLTYGPSSYEQTFGPG |
| Clone 17                | TRAV 8-6 TRAJ 30 | CAVSDQNRDDKIIFGKG | TRBV 6-1 TRBJ 2-7 | CASSQGLTYGPSSYEQTFGPG |
| Clone 22                | TRAV 8-6 TRAJ 30 | CAVSDQNRDDKIIFGKG | TRBV 6-1 TRBJ 2-7 | CASSQGLTYGPSSYEQTFGPG |
| Clone 29                | TRAV 8-6 TRAJ 30 | CAVSDQNRDDKIIFGKG | TRBV 6-1 TRBJ 2-7 | CASSQGLTYGPSSYEQTFGPG |
| Clone 41                | TRAV 8-6 TRAJ 30 | CAVSDQNRDDKIIFGKG | TRBV 6-1 TRBJ 2-7 | CASSQGLTYGPSSYEQTFGPG |

**Supplementary Table 2.** PCR forward and reverse primers used to identify and sequence IFN $\gamma$  gene locations containing CpG positions.

| CpG position | Location | Gene sequence      |
|--------------|----------|--------------------|
| 1            | -295     | GGC <u>CG</u> AAG  |
| 2            | -186     | CAT <u>CG</u> TCA  |
| 3            | -54      | ATAC <u>CG</u> TAA |
| 4            | +122     | TCT <u>CG</u> GAA  |
| 5            | +128     | AAAC <u>CG</u> ATG |
| 6            | +171     | CAT <u>CG</u> TTT  |

← Reside in  
transcription  
factor binding site

**Supplementary Table 3.** HLA-restriction and antigen-restriction by each antigen-specific T cells from different cancer patients

| Patient ID | T cells' HLA-restriction | Antigen specificity                                      |
|------------|--------------------------|----------------------------------------------------------|
| 8059       | HLA-A2                   | Influenza-specific CY9 peptide (CTELKLNDY)               |
| 435        | HLA-A2                   | SSX2 <sub>41-49</sub> KV9 peptide (KASEKIFYV)            |
| N002       | HLA-A2                   | NY-ESO-1 <sub>157-165</sub> SC9 peptide (SLLMWITQC)      |
| C012       | HLA-A2                   | NY-ESO-1 <sub>157-165</sub> SC9 peptide (SLLMWITQC)      |
| LUD0020    | HLA-A2                   | NY-ESO-1 <sub>157-165</sub> SC9 peptide (SLLMWITQC)      |
| 272762     | HLA-A2                   | CMV-specific pp65 <sub>495-503</sub> peptide (NVLPMVATV) |
| 274364     | HLA-A2                   | CMV-specific pp65 <sub>495-503</sub> peptide (NVLPMVATV) |
